# Supplementary material for: The Relationship Between Student Performance and Instructor Evaluations Revisited.
Source: Royal Society of Chemistry journal article supplement (doi:10.1039/c5dt04447b), 2004-01-01
Supplement: c5dt04447b1.pdf [file c5dt04447b1.pdf]

**Table S1** Stability constants of Np(V) complexation with carbonate at different temperatures with varying ionic strength of 0.1-3.0 M.

| Reaction                                                                | T/°C | Ionic medium             | log $\beta$   | Tech* | log $\beta_m^0$ | $\Delta H$<br>kJ·mol <sup>-1</sup> | $\Delta S$<br>J·K <sup>-1</sup> ·mol <sup>-1</sup> | Ref. |
|-------------------------------------------------------------------------|------|--------------------------|---------------|-------|-----------------|------------------------------------|----------------------------------------------------|------|
| $\text{NpO}_2^+ + \text{CO}_3^{2-} = \text{NpO}_2(\text{CO}_3)^-$       | 10   | 0.1 M LiClO <sub>4</sub> | 4.28 ± 0.12   | Spec. | 4.67 ± 0.26     | -8.6 ± 1.5                         | 58.6 ± 5.0                                         |      |
|                                                                         | 25   | 0.1 M LiClO <sub>4</sub> | 4.17 ± 0.12   | Spec. | 4.57 ± 0.26     |                                    |                                                    |      |
|                                                                         | 40   | 0.1 M LiClO <sub>4</sub> | 4.06 ± 0.15   | Spec. | 4.48 ± 0.27     |                                    |                                                    |      |
|                                                                         | 55   | 0.1 M LiClO <sub>4</sub> | 4.01 ± 0.15   | Spec. | 4.44 ± 0.28     |                                    |                                                    |      |
|                                                                         | 70   | 0.1 M LiClO <sub>4</sub> | 3.95 ± 0.18   | Spec. | 4.40 ± 0.30     |                                    |                                                    |      |
|                                                                         | 23   | 0.1 M NaCl               | 4.68 ± 0.03   | Spec. |                 |                                    |                                                    | 15   |
|                                                                         | 23   | 0.1 M NaCl               | 4.8 ± 0.1     | Sol.  |                 |                                    |                                                    | 16   |
|                                                                         | 25   | 0.1 M NaClO <sub>4</sub> | 4.34 ± 0.11   | Spec. |                 |                                    |                                                    | 7    |
|                                                                         | 25   | 0.1 M NaClO <sub>4</sub> | 4.58 ± 0.04   | Sol.  |                 |                                    |                                                    | 5b   |
|                                                                         | 25   | 0.2 M NaClO <sub>4</sub> | 4.13 ± 0.03   | Dist. |                 |                                    |                                                    | 4    |
|                                                                         | 25   | 0.37 M NaCl              | 4.368 ± 0.105 | CE    | 4.878 ± 0.118   |                                    |                                                    | 13   |
|                                                                         | 25   | 0.5 M NaClO <sub>4</sub> | 4.2 ± 0.1     | Spec  |                 |                                    |                                                    | 15   |
|                                                                         | 25   | 1.0 M NaClO <sub>4</sub> | 4.3 ± 0.2     | Spec  |                 |                                    |                                                    | 15   |
|                                                                         | 25   | 1.0 M NaClO <sub>4</sub> | 4.49 ± 0.06   | Sol.  |                 |                                    |                                                    | 8    |
|                                                                         | 25   | 1.0 M NaClO <sub>4</sub> | 4.14 ± 0.01   | Dist. |                 |                                    |                                                    | 9    |
|                                                                         | 25   | 1.0 M NaClO <sub>4</sub> | 4.50 ± 0.04   | Sol.  |                 |                                    |                                                    | 5b   |
|                                                                         | 25   | 3.0 M NaClO <sub>4</sub> | 4.76 ± 0.04   | Sol.  |                 |                                    |                                                    | 5b   |
|                                                                         | 25   | 3.0 M NaClO <sub>4</sub> | 5.09          | Sol.  |                 |                                    |                                                    | 10   |
|                                                                         | 25   | 3.0 M NaCl               | 4.3 ± 0.1     | Sol.  |                 |                                    |                                                    | 17   |
| $\text{NpO}_2^+ + 2\text{CO}_3^{2-} = \text{NpO}_2(\text{CO}_3)_2^{3-}$ | 10   | 0.1 M LiClO <sub>4</sub> | 6.09 ± 0.15   | Spec. | 6.04 ± 0.28     | 0.3 ± 1.7                          | 117 ± 7.0                                          | t.w. |
|                                                                         | 25   | 0.1 M LiClO <sub>4</sub> | 6.12 ± 0.18   | Spec. | 6.06 ± 0.30     |                                    |                                                    | t.w. |
|                                                                         | 40   | 0.1 M LiClO <sub>4</sub> | 6.10 ± 0.18   | Spec. | 6.05 ± 0.31     |                                    |                                                    | t.w. |
|                                                                         | 55   | 0.1 M LiClO <sub>4</sub> | 6.11 ± 0.18   | Spec. | 6.05 ± 0.31     |                                    |                                                    | t.w. |
|                                                                         | 70   | 0.1 M LiClO <sub>4</sub> | 6.11 ± 0.15   | Spec. | 6.06 ± 0.31     |                                    |                                                    | t.w. |
|                                                                         | 25   | 0.1 M NaClO <sub>4</sub> | 6.60 ± 0.04   | Sol.  |                 |                                    |                                                    | 5b   |
|                                                                         | 25   | 0.2 M LiClO <sub>4</sub> | 7.06 ± 0.04   | Dist. |                 |                                    |                                                    | 4    |
|                                                                         | 25   | 0.37 M NaCl              | 6.368 ± 0.11  | CE    | 6.559 ± 0.108   |                                    |                                                    | 15   |
|                                                                         | 25   | 0.5 M NaClO <sub>4</sub> | 6.4 ± 0.2     | Spec. |                 |                                    |                                                    | 15   |
|                                                                         | 25   | 1.0 M NaClO <sub>4</sub> | 6.7 ± 0.3     | Spec. |                 |                                    |                                                    | 15   |
|                                                                         | 25   | 1.0 M NaClO <sub>4</sub> | 6.78 ± 0.06   | Dist. |                 |                                    |                                                    | 9    |
|                                                                         | 25   | 1.0 M NaClO <sub>4</sub> | 7.11 ± 0.07   | Sol.  |                 |                                    |                                                    | 8    |
|                                                                         | 25   | 1.0 M NaClO <sub>4</sub> | 6.96 ± 0.06   | Sol.  |                 |                                    |                                                    | 5b   |
|                                                                         | 25   | 3.0 M NaCl               | 7.1 ± 0.2     | Sol.  |                 |                                    |                                                    | 17   |
|                                                                         | 25   | 3.0 M NaClO <sub>4</sub> | 7.69 ± 0.07   | Sol.  |                 |                                    |                                                    | 5b   |
|                                                                         | 25   | 3.0 M NaClO <sub>4</sub> | 8.15          | Sol.  |                 |                                    |                                                    | 10   |
| $\text{NpO}_2^+ + 3\text{CO}_3^{2-} = \text{NpO}_2(\text{CO}_3)_3^{5-}$ | 10   | 0.1 M LiClO <sub>4</sub> | 7.27 ± 0.21   | Spec. | 5.92 ± 0.31     | -21.0 ± 2.0                        | 40.6 ± 9.7                                         | t.w. |
|                                                                         | 25   | 0.1 M LiClO <sub>4</sub> | 7.18 ± 0.24   | Spec. | 5.80 ± 0.35     |                                    |                                                    | t.w. |
|                                                                         | 40   | 0.1 M LiClO <sub>4</sub> | 7.01 ± 0.27   | Spec. | 5.58 ± 0.36     |                                    |                                                    | t.w. |
|                                                                         | 55   | 0.1 M LiClO <sub>4</sub> | 6.86 ± 0.27   | Spec. | 5.40 ± 0.35     |                                    |                                                    | t.w. |
|                                                                         | 70   | 0.1 M LiClO <sub>4</sub> | 6.78 ± 0.33   | Spec. | 5.27 ± 0.41     |                                    |                                                    | t.w. |
|                                                                         | 25   | 0.37 M NaCl              | 7.764 ± 0.2   | CE.   | 5.636 ± 0.145   |                                    |                                                    | 13   |
|                                                                         | 25   | 0.5 M NaClO <sub>4</sub> | 7.8 ± 0.3     | Spec. |                 |                                    |                                                    | 15   |
|                                                                         | 25   | 1.0 M NaClO <sub>4</sub> | 8.5 ± 0.4     | Spec. |                 |                                    |                                                    | 15   |
|                                                                         | 25   | 1.0 M NaClO <sub>4</sub> | 8.53 ± 0.08   | Sol   |                 |                                    |                                                    | 8    |
|                                                                         | 25   | 1.0 M NaClO <sub>4</sub> | 8.67 ± 0.03   | Sol   |                 |                                    |                                                    | 5b   |
|                                                                         | 25   | 3.0 M NaClO <sub>4</sub> | 10.46         | Sol   |                 |                                    |                                                    | 10   |
|                                                                         | 25   | 3.0 M NaClO <sub>4</sub> | 10.3 ± 0.09   | Sol   |                 |                                    |                                                    | 5b   |
|                                                                         | 25   | 3.0 M NaCl               | 9.2 ± 0.2     | Sol   |                 |                                    |                                                    | 17   |

\*Spec. – spectrophotometry; Sol. – solubility; Dist. – solvent-solvent extraction distribution; CE. – Capillary electrochromatography; t.w. – this work.

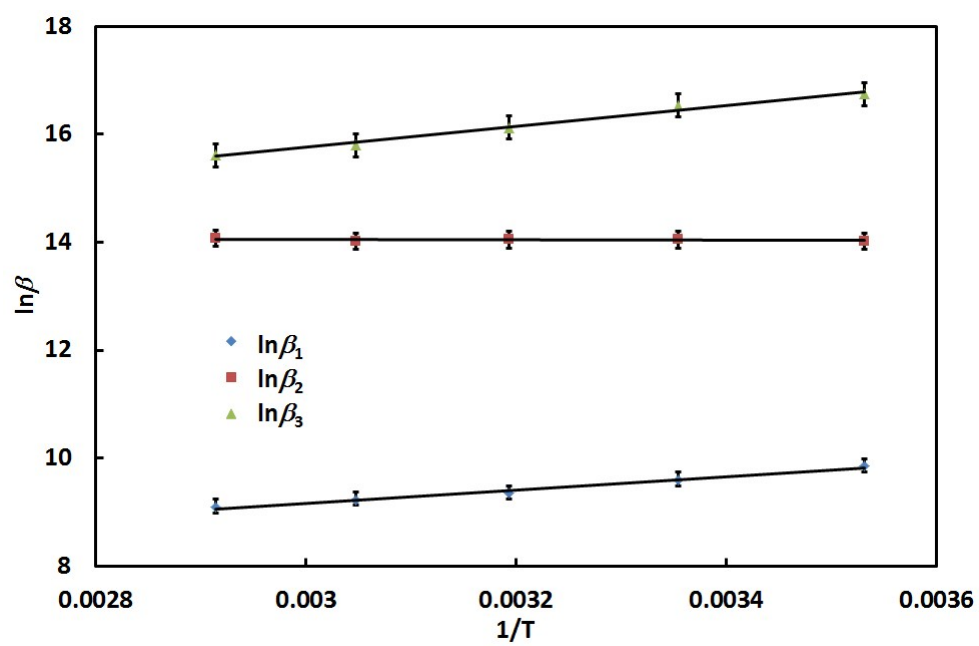

Figure S1 Plots of  $\ln\beta$  vs.  $1/T$  for Np(V)-carbonate complexation in 0.1 M LiClO<sub>4</sub>.
